# Supplementary material
Source: Springer Nature journal article supplement (https://www.springermedizin.de/resource/supplementary/12865_2013_562_MOESM3_ESM.pdf/9428292)

**a**

CD14+CD163+ %

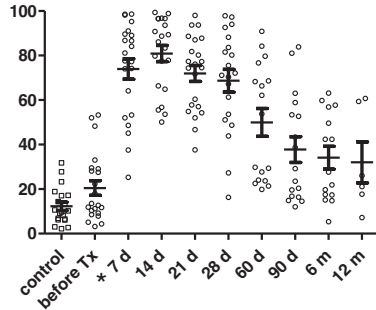**b**

CD14+CD163+ %

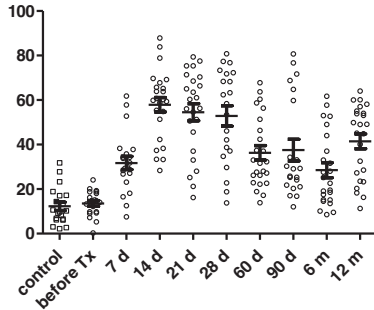**c**

CD14+CD163+ %

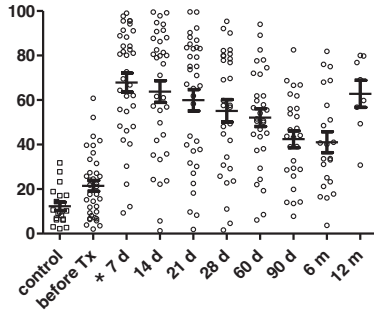

Supplement: MOESM3 [file 9428292]
